# Supplementary material for: A Cluster of Dengue Cases in Travelers: A Clinical Series from Thailand
Source: MDPI journal article supplement (doi:10.3390/tropicalmed6030152), 2021-08-14
Supplement: s1 [file s1]

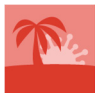

## Supplementary Materials

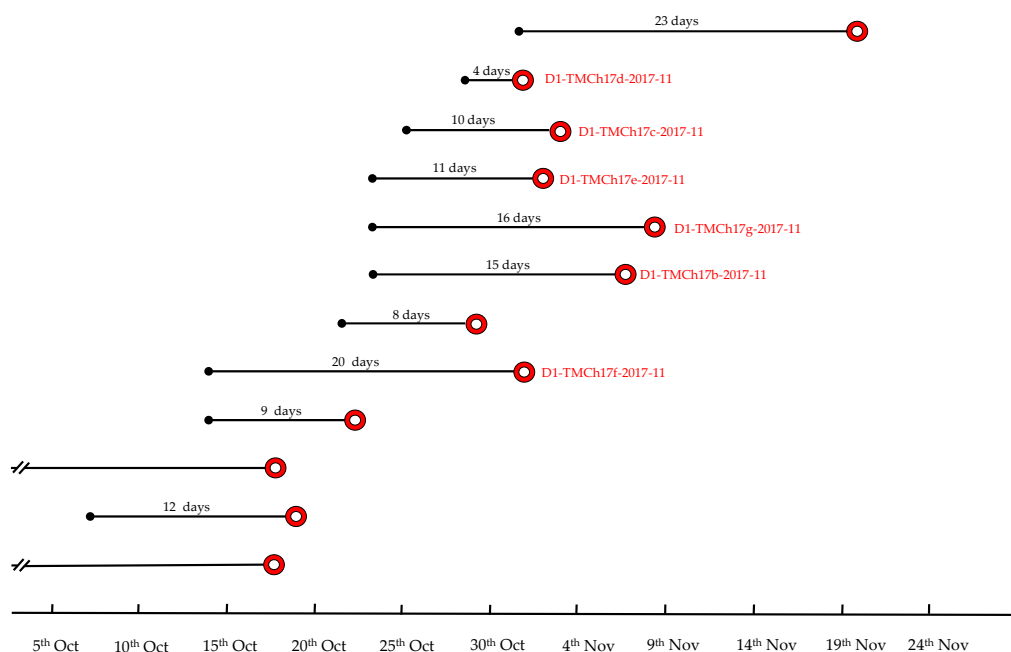

**Figure S1.** Time from date of arrival in Bangkok until symptoms developed, indicated in red with the sequence reference number.

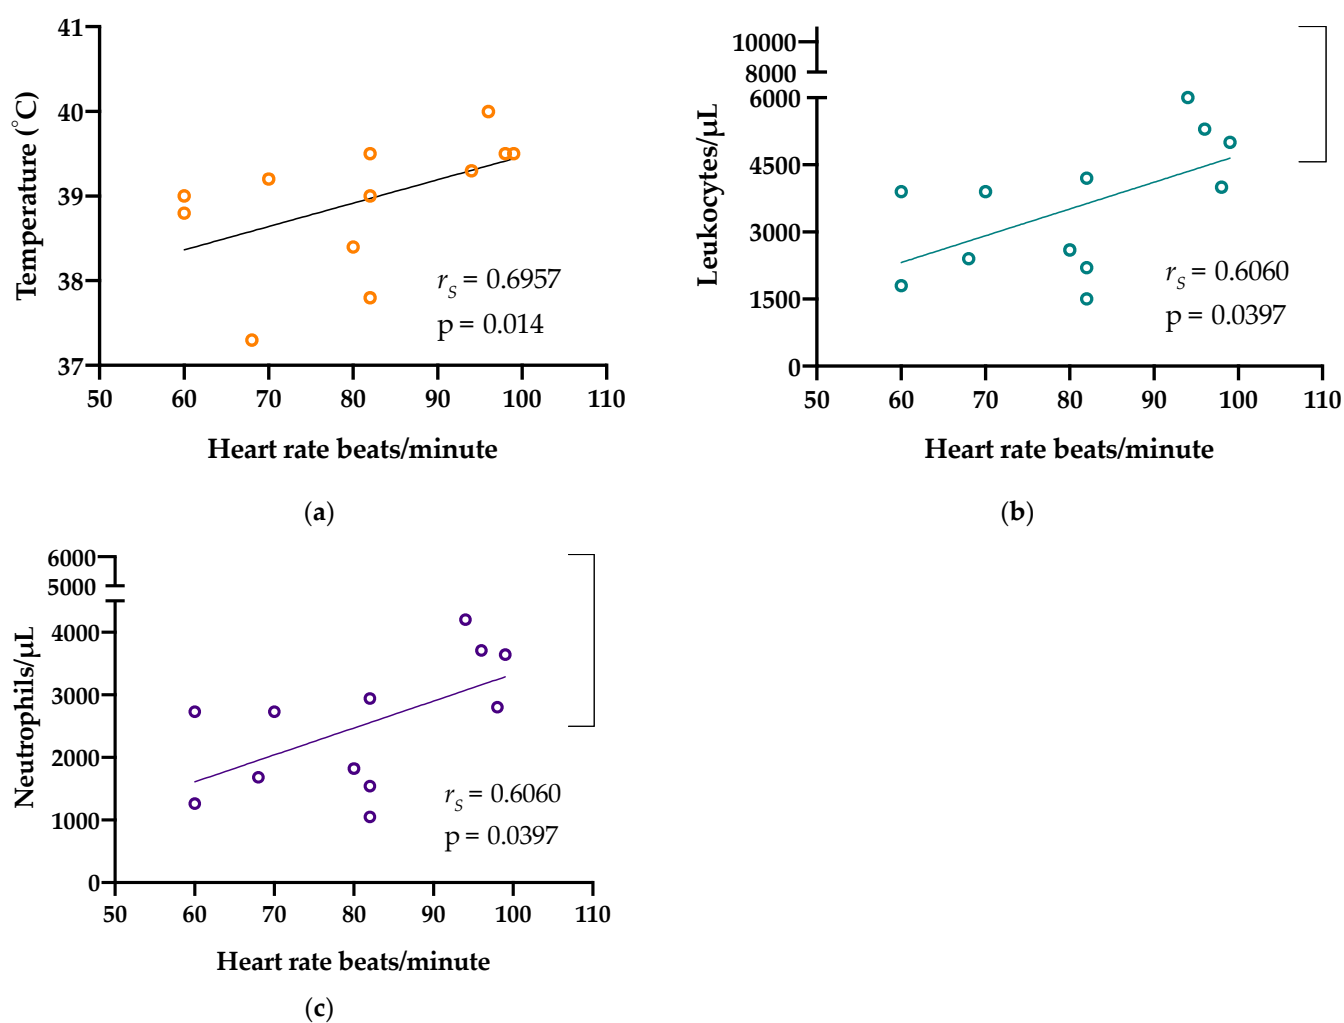

**Figure S2.** Spearman's correlation analysis of heart rate and temperature, leukocyte count, and neutrophil count. (a) Temperature and heart rate; (b) Leukocyte count and heart rate; (c) Neutrophils and heart rate. Normal ranges of parameters are shown in square brackets.

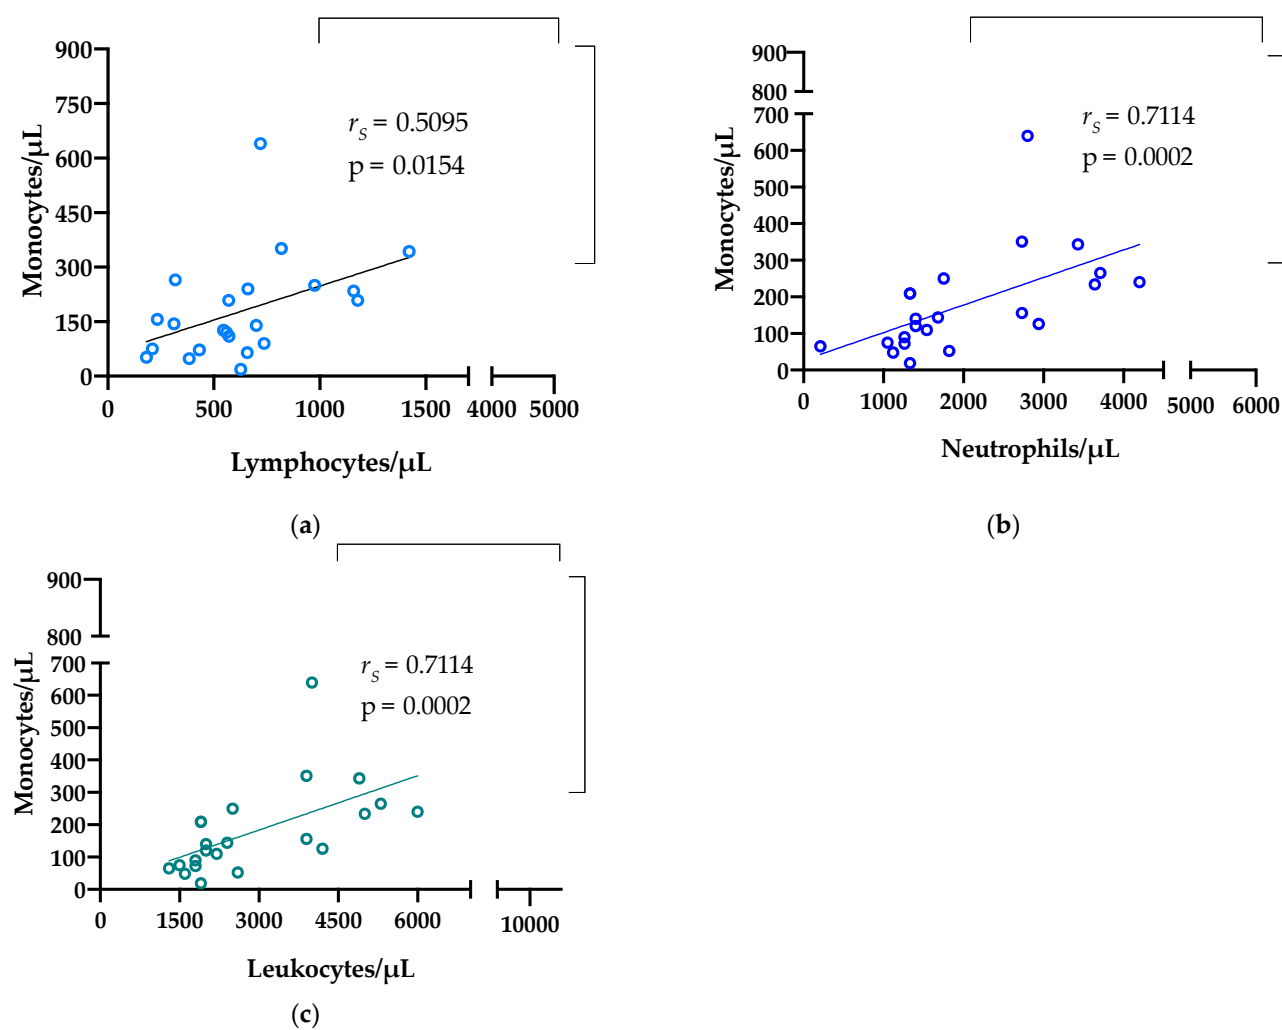

**Figure S3.** Spearman's correlation of monocyte count with other white blood indices (a) Monocytes with lymphocytes; (b) Monocytes with neutrophils; (c) Monocytes with leukocytes. Normal ranges of parameters are shown in square brackets.

**Table S1.** Descriptive analysis of the patient cohort.

|                                   | Dengue infection (12)  | Inpatient (9)          | Outpatient (3) | p value | adjusted p value |
|-----------------------------------|------------------------|------------------------|----------------|---------|------------------|
| Exposure duration, days           | 11.5 (8.7–17.0)        | 13.50 (9.25–19.0)      | 8 (4)          | 0.295   | 1.000            |
| Age, years                        | 18.0 (16.2–22.2)       | 17.0 (15.5–21.5)       | 19 (16)        | 0.576   | 1.000            |
| Body mass index kg/m <sup>2</sup> | 22.7 (21.2–25.2)       | 21.9 (21.0–24.1)       | 24.68 (22.60)  | 0.229   | 1.000            |
| Temperature °C                    | 39.1 (38.5–39.5)       | 39.3 (38.7–39.5)       | 38.80 (37.80)  | 0.225   | 1.000            |
| Heart rate, beats per minute      | 82.0 (68.5–95.5)       | 82.0 (74.0–97.0)       | 70 (60.00)     | 0.192   | 1.000            |
| Mean arterial pressure, mmHg      | 77.1 (71.5–90.0)       | 74.6 (70.6–89.3)       | 82.00 (79.33)  | 0.166   | 1.000            |
| Day of presentation, days         | 2.0 (1.2–2.7)          | 2.0 (1.5–3.0)          | 2 (1)          | 0.370   | 1.000            |
| Dizziness                         | 2 (16.7)               | 2 (22.2)               | 0              | 1.000   | 1.000            |
| Relative bradycardia              | 10 (83.3)              | 8 (88.9)               | 2 (66.7)       | 0.455   | 1.000            |
| Hepatomegaly                      | 2 (16.7)               | 2 (22.2)               | 0              | 1.000   | 1.000            |
| Headache                          | 7 (58.3)               | 7 (77.8)               | 0              | 0.045   | 1.000            |
| Myalgia                           | 4 (33.3)               | 3 (33.3)               | 1 (33.3)       | 1.000   | 1.000            |
| Rash                              | 4 (33.3)               | 4 (44.4)               | 0              | 0.491   | 1.000            |
| Bleeding                          | 2 (16.7)               | 2 (22.2)               | 0              | 1.000   | 1.000            |
| Loss of appetite                  | 4 (33.3)               | 4 (44.4)               | 0              | 0.491   | 1.000            |
| Nausea                            | 5 (41.7)               | 5 (55.6)               | 0              | 0.205   | 1.000            |
| Vomiting                          | 2 (16.7)               | 1 (11.1)               | 1 (33.3)       | 0.455   | 1.000            |
| Abdominal pain                    | 1 (8.3)                | 1 (11.1)               | 0              | 1.000   | 1.000            |
| Diarrhea                          | 2 (16.7)               | 2 (22.2)               | 0              | 1.000   | 1.000            |
| Fatigue                           | 1 (8.3)                | 1 (11.1)               | 0              | 1.000   | 1.000            |
| Hemoglobin, g/dL [14.00–18.00]    | 14.70 (13.25–14.97)    | 14.70 (13.30–14.95)    | 13.80 (13.00)  | 0.781   | 1.000            |
| Hematocrit, % [40.00–54.00]       | 43.40 (39.67–43.95)    | 43.50 (40.95–44.35)    | 39.90 (39.40)  | 0.309   | 1.000            |
| Leukocytes /μL [4500–11,000]      | 3900 (2250–4800)       | 3900 (2400–4800)       | 2400 (1500)    | 0.308   | 1.000            |
| Neutrophils /μL [2500–6000]       | 2730 (1575–3465)       | 2730 (1680–3675)       | 1680 (1050)    | 0.308   | 1.000            |
| Lymphocytes /μL [1000–4800]       | 489 (253–705)          | 572 (276–769)          | 312 (210)      | 0.229   | 1.000            |
| Monocytes /μL [300–900]           | 150 (83–258)           | 234 (91–308)           | 126 (75)       | 0.309   | 1.000            |
| Eosinophils /μL [50–500]          | 0 (0–46)               | 0 (0–39.50)            | 0 (0–0)        | 0.613   | 1.000            |
| Basophils /μL [0–300]             | 68 (137–417)           | 216 (138.45–426)       | 408 (120)      | 0.926   | 1.000            |
| Platelets /μL [150,000–450,000]   | 173000 (134000–212500) | 174000 (136000–219500) | 164000 (82000) | 0.309   | 1.000            |
| AST /IUL [0–40]                   | 36.50 (31.50–45.25)    | 33 (22.50–40.50)       | 40 (39)        | 0.101   | 1.000            |
| ALT /IUL [0–41]                   | 16.50 (13.25–59.00)    | 17 (11–45)             | 16 (14)        | 0.653   | 1.000            |
| Ct value [15–30]                  | 19.88 (18.86–25.44)    | 19.95 (18.04–25.62)    | 19.82 (19.82)  | 0.770   | 1.000            |

The data are in median (IQR), including frequencies with percentages. In some variables, only the median and the 25<sup>th</sup> percentile are provided due to low number of cases. Inpatient refers to cases hospitalized and outpatient refers to cases not requiring hospitalization. Day of presentation represents the day the patient visited the hospital after developing symptoms. Normal ranges of parameters are shown in square brackets.

**Table S2.** Descriptive analysis of cases with dengue warning signs.

|                                   | Warning signs (4)      | No warning signs (8)   | p value | adjusted p value |
|-----------------------------------|------------------------|------------------------|---------|------------------|
| Exposure duration, days           | 9.5 (8.2–10.7)         | 16.0 (10.0–20.7)       | 0.087   | 1.000            |
| Age, years                        | 15.5 (11.0–24.5)       | 19.0 (17.0–22.2)       | 0.230   | 1.000            |
| Body mass index kg/m <sup>2</sup> | 21.1 (18.4–22.6)       | 23.7 (22.6–27.1)       | 0.042   | 1.000            |
| Temperature °C                    | 39.1 (37.7–39.4)       | 39.1 (38.5–39.5)       | 0.797   | 1.000            |
| Hear rate, beats per minute       | 82.0 (71.0–91.0)       | 81.0 (62.0–97.0)       | 1.000   | 1.000            |
| Mean arterial pressure, mmHg      | 71.8 (68.5–74.3)       | 85.0 (76.0–95.4)       | 0.017   | 1.000            |
| Day of presentation, days         | 2.5 (2.0–4.5)          | 2.0 (1.0–2.0)          | 0.082   | 1.000            |
| Hospitalization, n (%)            | 4 (100)                | 5 (62.5)               | 0.491   | 1.000            |
| Dizziness                         | 0                      | 2 (25)                 | 0.515   | 1.000            |
| Relative bradycardia              | 3 (75)                 | 7 (87.5)               | 1.000   | 1.000            |
| Hepatomegaly                      | 2 (50)                 | 0                      | 0.091   | 1.000            |
| Headache                          | 2 (50)                 | 5 (62.5)               | 1.000   | 1.000            |
| Myalgia                           | 1 (25)                 | 3 (37.5)               | 1.000   | 1.000            |
| Rash                              | 1 (25)                 | 3 (37.5)               | 1.000   | 1.000            |
| Bleeding                          | 2 (50)                 | 0                      | 0.091   | 1.000            |
| Loss of appetite                  | 3 (75)                 | 1 (12.5)               | 0.067   | 1.000            |
| Nausea                            | 3 (75)                 | 1 (12.5)               | 0.222   | 1.000            |
| Vomiting                          | 1 (25)                 | 1 (12.5)               | 1.000   | 1.000            |
| Abdominal pain                    | 1 (25)                 | 0                      | 0.333   | 1.000            |
| Diarrhea                          | 1 (25)                 | 1 (12.5)               | 1.000   | 1.000            |
| Fatigue                           | 0                      | 1 (12.5)               | 1.000   | 1.000            |
| Hemoglobin, g/dL [14.00–18.00]    | 14.05 (12.35–14.92)    | 14.75 (13.35–15.42)    | 0.444   | 1.000            |
| Hematocrit, % [40.00–54.00]       | 43.05 (37.72–43.95)    | 43.40 (39.67–44.42)    | 0.865   | 1.000            |
| Leukocytes /μL [4500–11,000]      | 3050 (1900–3900)       | 4100 (2450–5225)       | 0.173   | 1.000            |
| Neutrophils /μL [2500–6000]       | 2135 (1330–2730)       | 2870 (1715–3692)       | 0.173   | 1.000            |
| Lymphocytes /μL [1000–4800]       | 502 (283–757)          | 432 (235–705)          | 0.734   | 1.000            |
| Monocytes /μL [300–900]           | 133 (81–302)           | 189 (87–258)           | 0.734   | 1.000            |
| Eosinophils /μL [50–500]          | 0 (0–43)               | 0 (0–46)               | 0.762   | 1.000            |
| Basophils /μL [0–300]             | 303 (156–444)          | 266 (132–417)          | 0.734   | 1.000            |
| Platelets /μL [150,000–450,000]   | 191000 (124500–212500) | 168000 (134000–217250) | 0.734   | 1.000            |
| AST /IUL [0–40]                   | 30.5 (14)              | 36.5 (32.5–154.25)     | 0.739   | 1.000            |
| ALT /IUL [0–41]                   | 41 (9)                 | 16.5 (13.75–97)        | 0.737   | 1.000            |
| Ct value [15–30]                  | 25.62 (25.62)          | 19.75 (17.22–19.92)    | 0.064   | 1.000            |

The data are in median (IQR), including frequencies with percentages. In some variables, only the median and the 25<sup>th</sup> percentile are provided due to low number of cases. Day of presentation represents the day the patient visited the hospital after developing symptoms. Normal ranges of parameters are shown in square brackets.

**Table S3.** Descriptive analysis by age group.

|                                   | Adolescent (8)         | Adults (4)             | p value | adjusted p value |
|-----------------------------------|------------------------|------------------------|---------|------------------|
| Exposure duration, days           | 11.5 (9.7–16.0)        | 14.0 (52.0–2.2)        | 1.000   | 1.000            |
| Age, years                        | 17.0 (14.5–18.5)       | 25.0 (20.7–30.7)       | 0.006   | 0.198            |
| Body mass index kg/m <sup>2</sup> | 21.9 (21.0–24.1)       | 24.3 (22.9–29.5)       | 0.062   | 1.000            |
| Temperature °C                    | 39.1 (38.8–39.5)       | 38.8 (37.5–39.8)       | 0.607   | 1.000            |
| Hear rate, beats per minute       | 82.0 (65.5–97.0)       | 75.0 (68.5–92.0)       | 0.493   | 1.000            |
| Mean arterial pressure, mmHg      | 74.8 (71.5–81.3)       | 93.8 (75.4–104.7)      | 0.126   | 1.000            |
| Day of presentation, days         | 2.0 (2.0–2.7)          | 1.5 (1.0–4.2)          | 0.522   | 1.000            |
| Hospitalization, n (%)            | 4 (100)                | 5 (62.5)               | 1.000   | 1.000            |
| Dizziness                         | 2 (25)                 | 0                      | 0.515   | 1.000            |
| Relative bradycardia              | 7 (87.5)               | 3 (75)                 | 1.000   | 1.000            |
| Hepatomegaly                      | 1 (12.5)               | 1 (25)                 | 1.000   | 1.000            |
| Headache                          | 5 (62.5)               | 2 (50)                 | 1.000   | 1.000            |
| Myalgia                           | 2 (25)                 | 2 (50)                 | 0.547   | 1.000            |
| Rash                              | 2 (25)                 | 2 (50)                 | 0.547   | 1.000            |
| Bleeding                          | 1 (12.5)               | 1 (25)                 | 1.000   | 1.000            |
| Loss of appetite                  | 3 (37.5)               | 1 (25)                 | 1.000   | 1.000            |
| Nausea                            | 3 (37.5)               | 2 (50)                 | 1.000   | 1.000            |
| Vomiting                          | 2 (25)                 | 0                      | 0.515   | 1.000            |
| Abdominal pain                    | 1 (12.5)               | 0                      | 1.000   | 1.000            |
| Diarrhea                          | 2 (25)                 | 0                      | 0.515   | 1.000            |
| Fatigue                           | 1 (12.5)               | 0                      | 1.000   | 1.000            |
| Hemoglobin, g/dL [14.00–18.00]    | 14.75 (13.25–14.97)    | 14.25 (12.45–15.97)    | 0.799   | 1.000            |
| Hematocrit, % [40.00–54.00]       | 43.55 (40.27–43.95)    | 41.60 (37.12–47.12)    | 0.610   | 1.000            |
| Leukocytes /μL [4500–11,000]      | 3250 (2500–4800)       | 4100 (2450–5225)       | 0.932   | 1.000            |
| Neutrophils /μL [2500–6000]       | 2275 (1575–3465)       | 2870 (1715–3692)       | 0.932   | 1.000            |
| Lymphocytes /μL [1000–4800]       | 559 (342–779)          | 432 (235–705)          | 0.308   | 1.000            |
| Monocytes /μL [300–900]           | 135 (81.50–223.50)     | 189 (87–258)           | 0.308   | 1.000            |
| Eosinophils /μL [50–500]          | 0 (0–50.37)            | 0 (0–46)               | 0.613   | 1.000            |
| Basophils /μL [0–300]             | 312 (137.47–451.50)    | 266 (132–417)          | 0.396   | 1.000            |
| Platelets /μL [150,000–450,000]   | 157000 (114000–204500) | 168000 (134000–217250) | 0.396   | 1.000            |
| AST /IUL [0–40]                   | 39 (32.50–272)         | 36.5 (32.5–154.25)     | 0.297   | 1.000            |
| ALT /IUL [0–41]                   | 17 (16.5–205)          | 16.5 (13.75–97)        | 0.024   | 0.792            |
| Ct value [15–30]                  | 22.61 (17.29–25.80)    | 19.75 (19.68)          | 0.355   | 1.000            |

The data are in median (IQR), including frequencies with percentages. In some variables, only the median and the 25<sup>th</sup> percentile are provided due to low number of cases. Day of presentation represents the day the patient visited the hospital after developing symptoms. Normal ranges of parameters are shown in square brackets.
